# Supplementary material for: Absence of VGLUT3 Expression Leads to Impaired Fear Memory in Mice
Source: eNeuro. 2023 Feb 22;10(2):ENEURO.0304-22.2023. doi: 10.1523/ENEURO.0304-22.2023 (PMC9953049; doi:10.1523/ENEURO.0304-22.2023)
Supplement: Extended Data Figure 1-1 — Statistics for watermaze experiments. 1: SRM 10 min; 2: SRM 72 h; 3: SRM-R 10 min; 4: SRM-R 48 h; 5: PTs average. Download Figure 1-1, DOCX file. [file enu-eN-NWR-0304-22-s02.docx]

| Figure 1 | N (mice) | Statistical analysis | | value | p-value |
| --- | --- | --- | --- | --- | --- |
| Fig. 1D | WT (n=15), KO (n=11) | Two-way RM ANOVA | Genotype | F1,24=0.5923 | 0.4490 |
| Days | F3,72=79.33 | **<0.0001** |
| Genotype x Days | F3,72=0.9438 | 0.4241 |
| Fig. 1E | Two-way RM ANOVA | Genotype | F1,24=0.00026 | 0.9871 |
| Days | F7,168=50.24 | **<0.0001** |
| Genotype x Days | F7,168=0.9339 | 0.4819 |
| Fig. 1F1 | Unpaired t test (two-tailed) | | t=1.44, df=24 | 0.1607 |
| WT to 25% chance level | | t=6.853, df=14 | **<0.0001** |
| KO to 25% chance level | | t=7.007, df=10 | **<0.0001** |
| Fig. 1F2 | Unpaired t test (two-tailed) | | t=2.60, df=24 | **0.0156** |
| WT to 25% chance level | | t=5.913, df=14 | **<0.0001** |
| KO to 25% chance level | | t=11.48, df=10 | **<0.0001** |
| Fig. 1F3 | Unpaired t test (two-tailed) | | t=1.16, df=24 | 0.2543 |
| WT to 25% chance level | | t=4.542, df=14 | **0.0005** |
| KO to 25% chance level | | t=6.451, df=10 | **<0.0001** |
| Fig. 1F4 | Unpaired t test (two-tailed) | | t=1.45, df=24 | 0.1601 |
| WT to 25% chance level | | t=4.069, df=14 | **0.0011** |
| KO to 25% chance level | | t=7.218, df=10 | **<0.0001** |
| Fig. 1F5 | Unpaired t test (two-tailed) | | t=2.38, df=24 | **0.0254** |
| WT to 25% chance level | | t=7.789, df=14 | **<0.0001** |
| KO to 25% chance level | | t=11.35, df=10 | **<0.0001** |
| Fig. 1G | WT (n=13), KO (n=11) | Two-way RM ANOVA | Genotype | F1,22=0.0666 | 0.7987 |
| Days | F3,66=118.3 | **<0.0001** |
| Genotype x Days | F3,66=0.4520 | 0.7167 |
| Fig. 1H | Two-way RM ANOVA | Genotype | F1,22=0.0026 | 0.9592 |
| Days | F7,154=17.94 | **<0.0001** |
| Genotype x Days | F7,154=0.6502 | 0.7138 |
| Fig. 1I1 | Unpaired t test (two-tailed) | | t=0.96, df=22 | 0.3462 |
| WT to 25% chance level | | t=8.747, df=12 | **<0.0001** |
| KO to 25% chance level | | t=5.790, df=10 | **0.0002** |
| Fig. 1I2 | Unpaired t test (two-tailed) | | t=0.50, df=22 | 0.6193 |
| WT to 25% chance level | | t=4.101, df=12 | **0.0015** |
| KO to 25% chance level | | t=3.807, df=10 | **0.0034** |
| Fig. 1I3 | Unpaired t test (two-tailed) | | t=0.01, df=22 | 0.9872 |
| WT to 25% chance level | | t=4.277, df=12 | **0.0011** |
| KO to 25% chance level | | t=4.405, df=10 | **0.0013** |
| Fig. 1I4 | Unpaired t test (two-tailed) | | t=0.12, df=22 | 0.9016 |
| WT to 25% chance level | | t=3.728, df=12 | **0.0029** |
| KO to 25% chance level | | t=6.588, df=10 | **<0.0001** |
| Fig. 1I5 | Unpaired t test (two-tailed) | | t=0.51, df=22 | 0.6126 |
| WT to 25% chance level | | t=9.224, df=12 | **<0.0001** |
| KO to 25% chance level | | t=7.347, df=10 | **<0.0001** |
| Fig. 1F/I | WT-22°C (n=15) KO-22°C (n=11) WT-19°C (n=13) KO-19°C (n=11) | 3 way ANOVA | Genotype | F1,46=1.641 | 0.2066 |
| Temperature (T) | F1,46=0.51 | 0.4786 |
| Probe Test (PT) | F3,138=1.12 | 0.3433 |
| Genotype x PT | F3,138=0.1064 | 0.9562 |
| Genotype x T | F1,46=4.09 | **0.04** |
| T x PT | F3,138=0.5871 | 0.6244 |
| Genotype  x T x PT | F3,138=0.2556 | 0.8573 |

1: SRM 10min ; 2: SRM 72h ; 3: SRM-R 10min ; 4: SRM-R 48h ; 5: PTs average
