# Supplementary material for: Absence of VGLUT3 Expression Leads to Impaired Fear Memory in Mice
Source: eNeuro. 2023 Feb 22;10(2):ENEURO.0304-22.2023. doi: 10.1523/ENEURO.0304-22.2023 (PMC9953049; doi:10.1523/ENEURO.0304-22.2023)
Supplement: Extended Data Figure 3-1 — Statistics for fear conditioning experiments. Download Figure 3-1, DOCX file. [file enu-eN-NWR-0304-22-s04.docx]

| **Figure 3** | **N (mice)** | **Statistical analysis** | | **value** | **p-value** |
| --- | --- | --- | --- | --- | --- |
| Fig. 3A | WT (n=8), KO (n=6) | Two-way RM ANOVA | Genotype | F1,12=0.6328 | 0.4418 |
| Behaviors | F3,36=36.57 | **<0.0001** |
| Genotype x Behaviors | F3,36=3.874 | **0.0169** |
| Fig. 3B | WT (n=12), KO (n=12) | Two-way RM ANOVA | Genotype | F1,22=1.540 | 0.2277 |
| Time | F7,154=14.88 | **<0.0001** |
| Genotype x Time | F7,154=0.8944 | 0.5125 |
| Fig. 3C | Two-way RM ANOVA | Genotype | F1,22=2.602 | 0.1210 |
| Time | F11,242=4.012 | **<0.0001** |
| Genotype x Time | F11,242=4.161 | **<0.0001** |
| Fig. 3D | Two-way RM ANOVA | Genotype | F1,22=2.602 | 0.1210 |
| Time | F1,22=5.271 | **0.0316** |
| Genotype x Time | F1,22=5.775 | **0.0251** |
| Fig. 3E | Two-way RM ANOVA | Genotype | F1,22=1.496 | 0.2343 |
| Time | F11,242=3.554 | **0.0001** |
| Genotype x Time | F11,242=0.8698 | 0.5707 |
| Fig. 3F | Two-way RM ANOVA | Genotype | F1,22=1.32 | 0.2629 |
| Time | F1,22=7.743 | **0.0109** |
| Genotype x Time | F1,22=0.6567 | 0.4264 |
